# Supplementary material for: Hydrogels containing layered double hydroxide nanosheets: rheological behaviour and excellent stabilities
Source: Royal Society of Chemistry journal article supplement (doi:10.1039/c3ra42425a), 2013-01-01
Supplement: c3ra42425a.pdf [file c3ra42425a.pdf]

Electronic Supplementary Information (ESI) Materials for RSC Advances  
This journal is © The Royal Society of Chemistry 2013

# Hydrogels containing layered double hydroxide nanosheets: rheological behaviour and excellent stabilities

Ziqiao Hu and Guangming Chen\*

*<sup>a</sup>Beijing National Laboratory for Molecular Sciences (BNLMS), Institute of  
Chemistry, Chinese Academy of Sciences, Beijing 100190, P. R. China. E-mail:  
chengm@iccas.ac.cn.*

*<sup>b</sup>University of Chinese Academy of Sciences, Beijing 100049, P. R. China*

\*Corresponding author.

## Experimental

### Materials

Sodium isethionate ( $\text{HO}(\text{CH}_2)_2\text{SO}_3\text{Na}$ ) was purchased from Sigma-Aldrich Chemical Reagent Co., Ltd (98% in purity), and used without further purification. All of the chemicals including  $\text{Mg}(\text{NO}_3)_2 \cdot 6\text{H}_2\text{O}$ , and  $\text{Al}(\text{NO}_3)_3 \cdot 9\text{H}_2\text{O}$  are of analytical pure reagent (A.R.) grade. In all of the experiments, deionized water was used.

### Preparations

$\text{MgAl-LDH-NO}_3$  was synthesized by a typical coprecipitation method. In brief, an aqueous solution of  $\text{Mg}(\text{NO}_3)_2$  (0.75 M) and  $\text{Al}(\text{NO}_3)_3$  (0.25 M) and a solution of NaOH (1 M) were added dropwisely into the  $\text{NaNO}_3$  solution (0.1 M). During adding process, the pH value of the system was kept at constant pH = 10.0 under vigorous stirring in nitrogen atmosphere. Then, the mixture was aged at 80 °C for 8 h. Finally, the resulting precipitation was filtrated, washed with deionized water, and dried in a vacuum oven at 50 °C for 24 h.

LDH-Ise was prepared according to the literature (N. Iyi, Y. Ebina and T. Sasaki, *J. Mater. Chem.*, 2011, 21, 8085–8095), in which anion exchange was repeated for three times and no  $\text{NO}_3^-$  remained could be detected by FTIR spectroscopy.

The prepared LDH-Ise powder was added into water at concentration of 10, 15, 17.5, 20, 25, 30, 40 or 50 g L<sup>-1</sup>. Up to 5 min under ultrasonic treatment, it swelled automatically. After resting for a few minutes or hours, a series of translucent LDH-Ise green hydrogels were obtained.

### Characterization

X-ray diffraction (XRD) measurements were conducted using a Rigaku D/max 2500 diffractometer with Cu K $\alpha$  radiation ( $\lambda = 0.15418$  nm) at a scanning rate of 4° min<sup>-1</sup>. Fourier transform infrared (FTIR) spectra (KBr pellet) were recorded using a Perkin-Elmer System 2000 FTIR spectrophotometer for 64 scans in the wavenumber range of 4000 to 400 cm<sup>-1</sup>. The contents of Mg and Al were analyzed using an Axial View Inductively Coupled Plasma (ICP) Spectrometer using a diluted nitric acid solution. And the content analysis of C, H and N elements was carried out using a Flash EA 1112 apparatus. The scanning electron microscopic (SEM) images were collected using a

HITACHI S-4800 scanning electron microscope with an acceleration voltage of 15 kV. The transmission electron microscopic (TEM) images of freeze-etched sample for the LDH-Ise hydrogel (30 g L<sup>-1</sup>) were collected using a JEM-1011 transmission electron microscopy with an acceleration voltage of 100 kV. The sample was frozen in liquid nitrogen and then freeze-etched by Leica BAF 060 freeze-etching machine. (A. Klaus, G. J. T. Tiddy, R. Rachel, A. P. Trinh, E. Maurer, D. Touraud and W. Kunz, *Langmuir*, 2011, **27**, 4403)

Rheological measurements were performed on an AR2000ex rheometer measured at 25 °C under nitrogen atmosphere. A pair of parallel plates with diameter of 40 mm and a sample gap size of 700 μm were adopted. Strain sweep experiments were first carried out from 0.1% to 100% at an angular frequency of 1 rad s<sup>-1</sup> to obtain the linear regime. Then, the dynamic frequency sweep measurements were performed at a strain of 0.1% at shear rate range of 0.1 to 100 rad s<sup>-1</sup>.

Swelling experiments were carried out by immersing the hydrogel samples at various concentrations in an excess of deionized water at 25 °C for 3 days to reach swelling equilibrium. Subsequently, the hydrogels were weighed after removing excess water from the surface by filter paper. Thus, the relative weight swelling ratio could be measured by  $(m_2 - m_1)/m_1$ , where  $m_2$  was the equilibrium weight of the swollen hydrogel and  $m_1$  was the weight of the original hydrogel sample. For the hydrogels at each concentration, five samples were adopted, and the average values were used.

**Table S1** Data of elemental analysis for LDH-Ise

|     | C    | H    | N     |
|-----|------|------|-------|
| wt% | 5.83 | 4.11 | <0.3% |

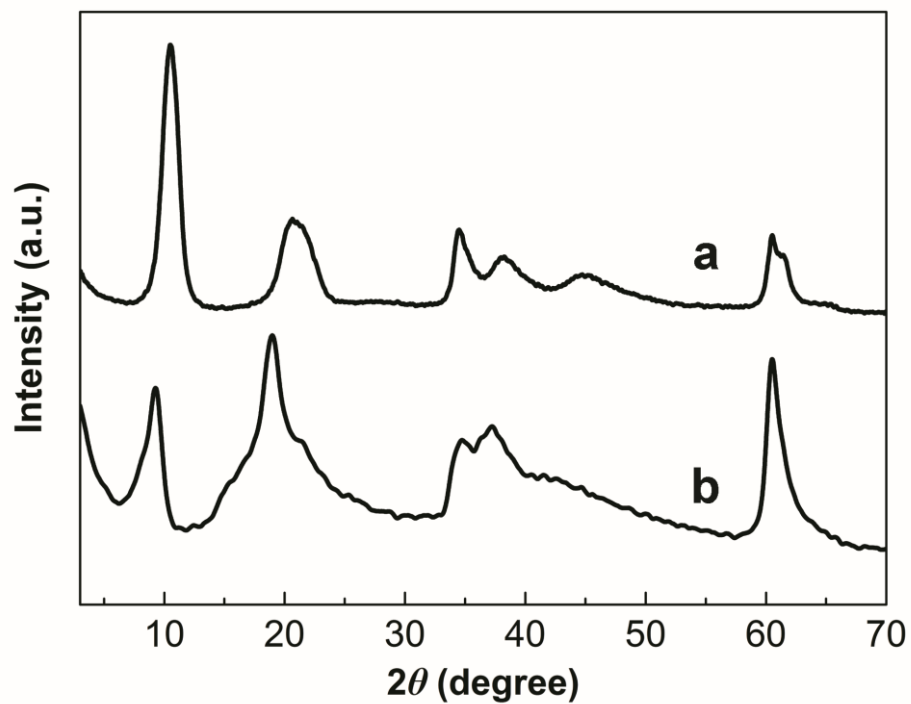

**Fig. S1** XRD patterns of (a) LDH-NO<sub>3</sub> and (b) LDH-Ise powders.

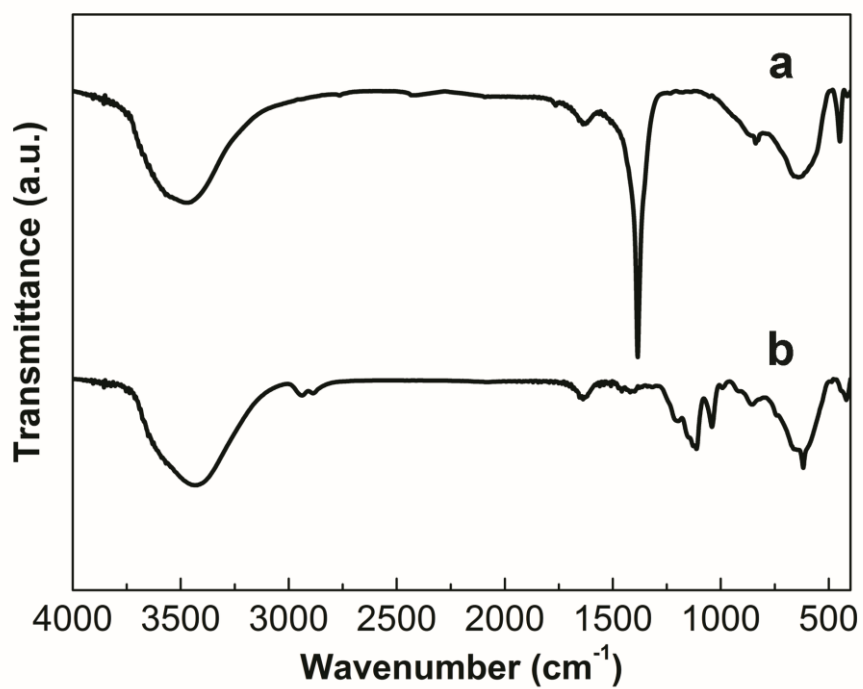

**Fig. S2** FTIR spectra of (a) LDH-NO<sub>3</sub> and (b) LDH-Ise powders.

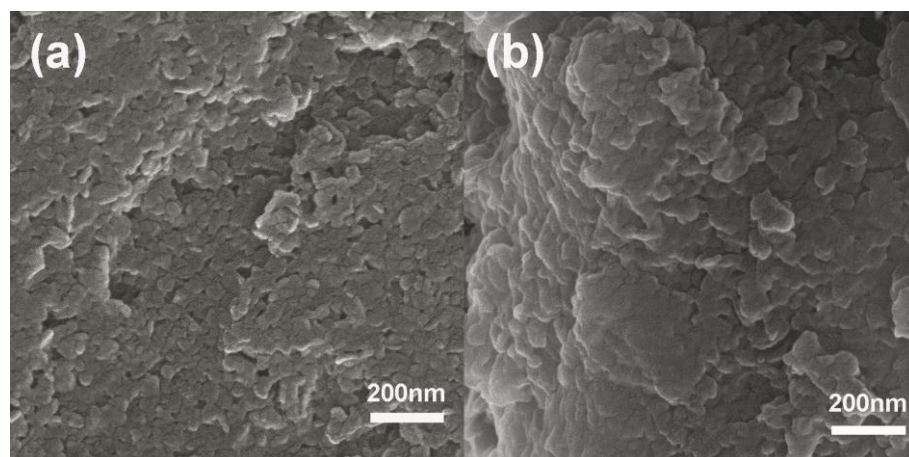

**Fig. S3** SEM images of (a) LDH-NO<sub>3</sub> and (b) LDH-Ise powders.

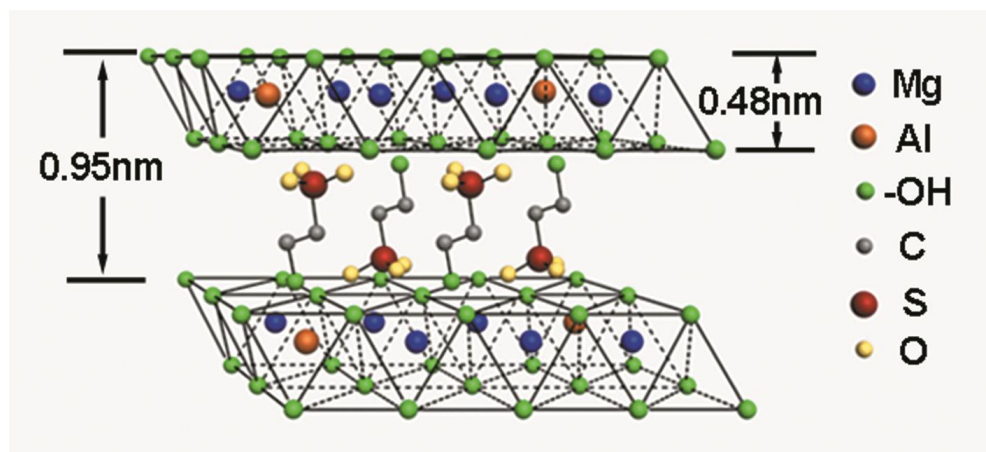

**Scheme S1** Schematic illustration of interlayer arrangement for isethionate anions intercalated in LDH-Ise.

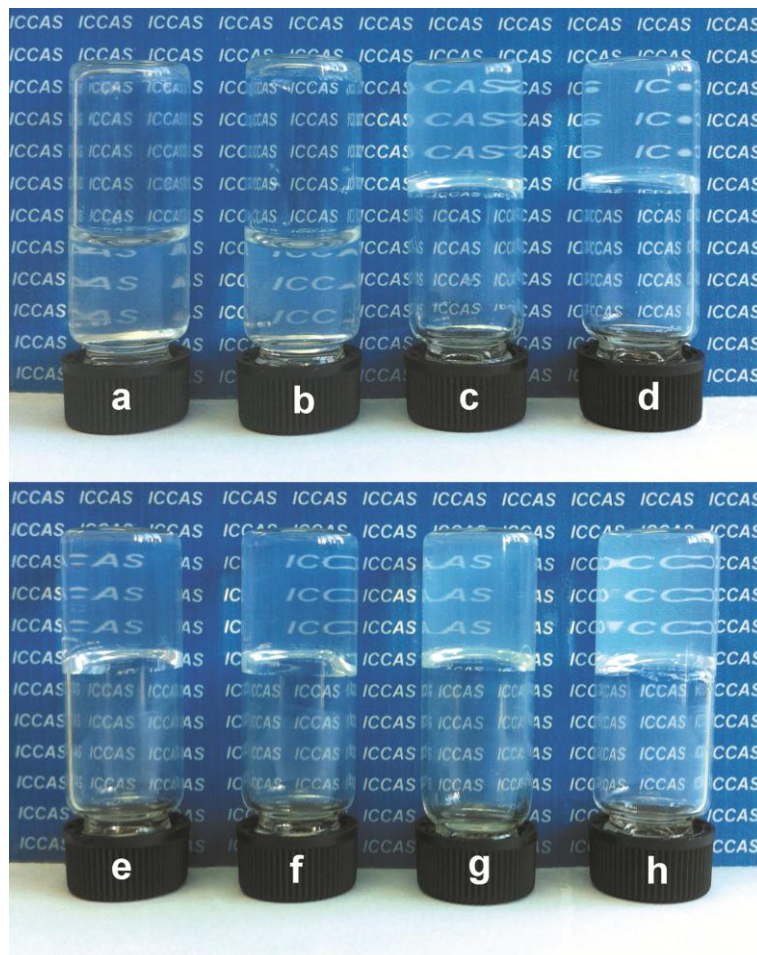

**Fig. S4** Vials showing the concentration effect on sol to gel transition for LDH-Ise, where the concentrations were (a) 10, (b) 15, (c) 17.5, (d) 20, (e) 25, (f) 30, (g) 40 and (h) 50 g L<sup>-1</sup>, respectively.



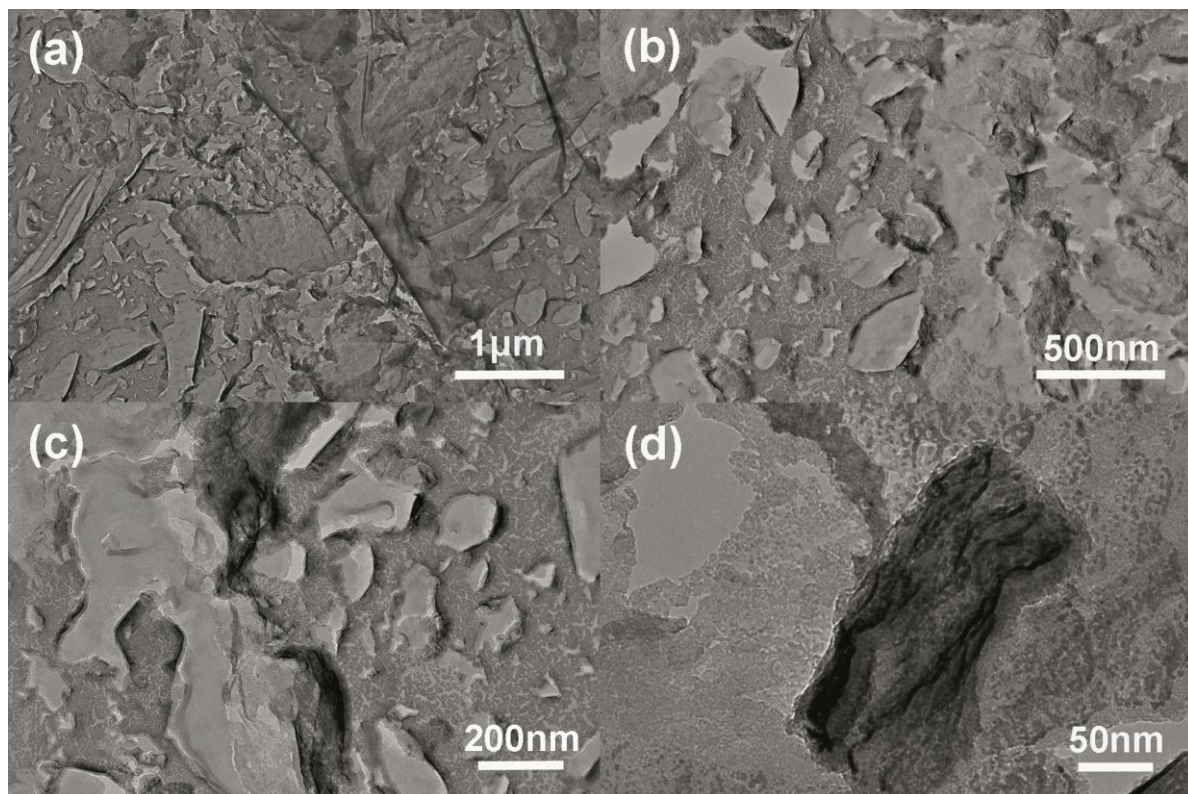

**Fig. S5** TEM images of the freeze-etched sample for LDH-Ise hydrogel (30 g L<sup>-1</sup>).

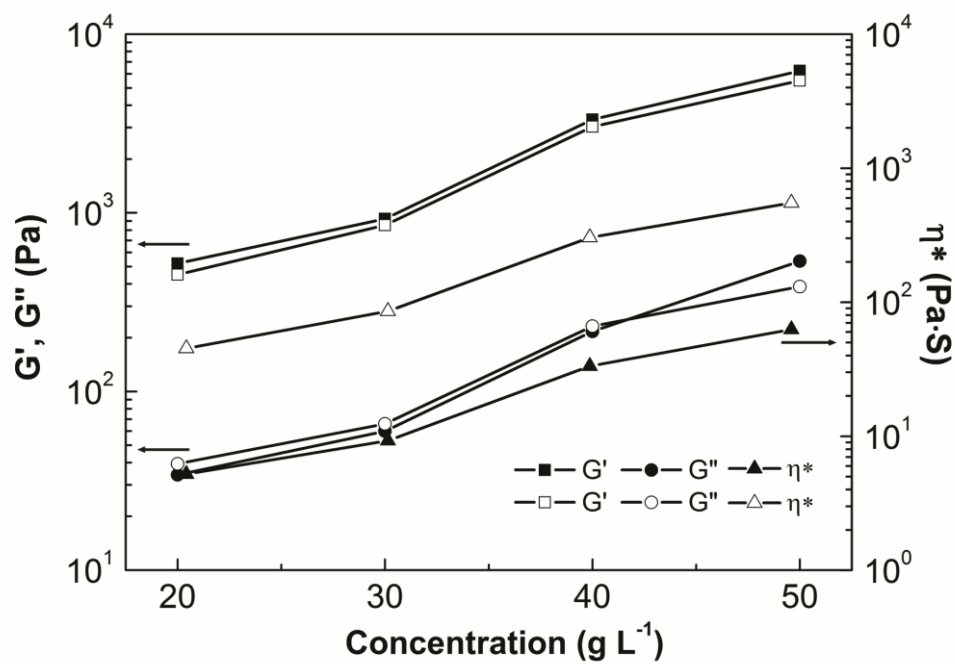

**Fig. S6** At fixed frequencies, effect of concentration on the  $G'$ ,  $G''$  and  $\eta^*$  (black and white symbols corresponded to the frequency of 100 and 10  $\text{rad s}^{-1}$ , respectively).



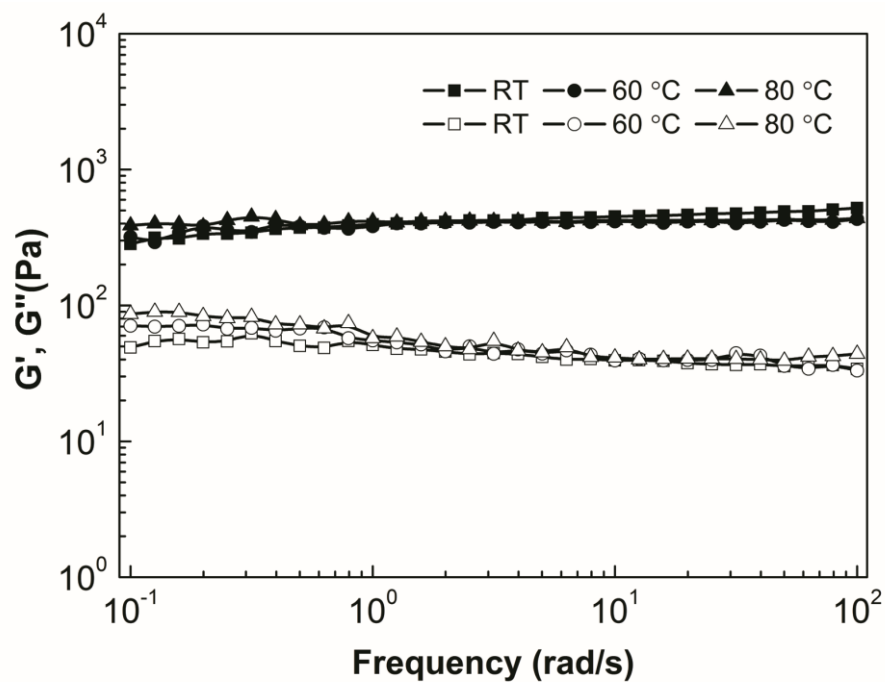

**Fig. S7** Effect of temperature on  $G'$  and  $G''$  (black and white symbols were denoted as  $G'$  and  $G''$ , respectively).

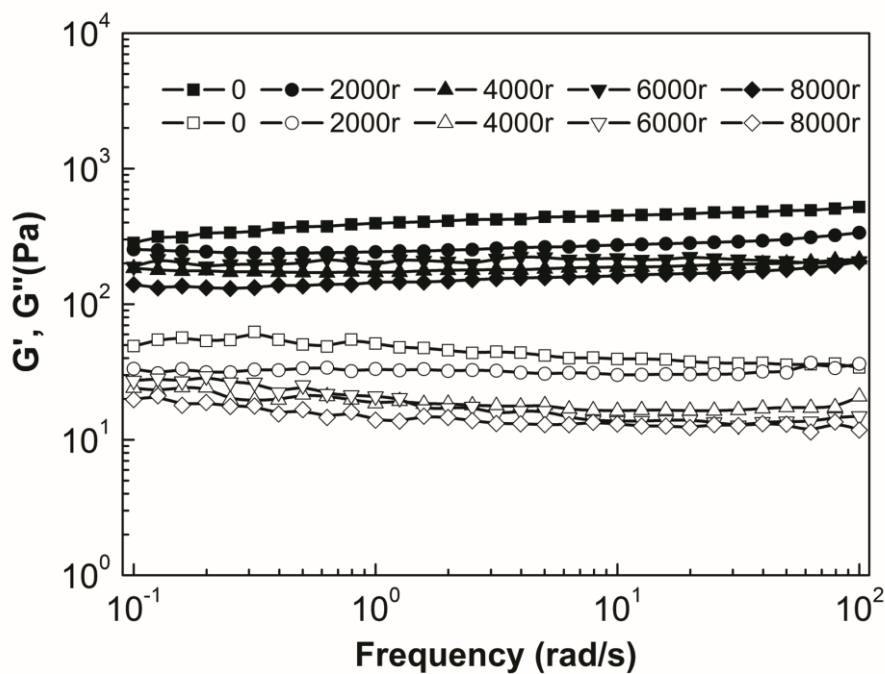

**Fig. S8** Effect of centrifugation on  $G'$  and  $G''$  (black and white symbols were denoted as  $G'$  and  $G''$ , respectively).

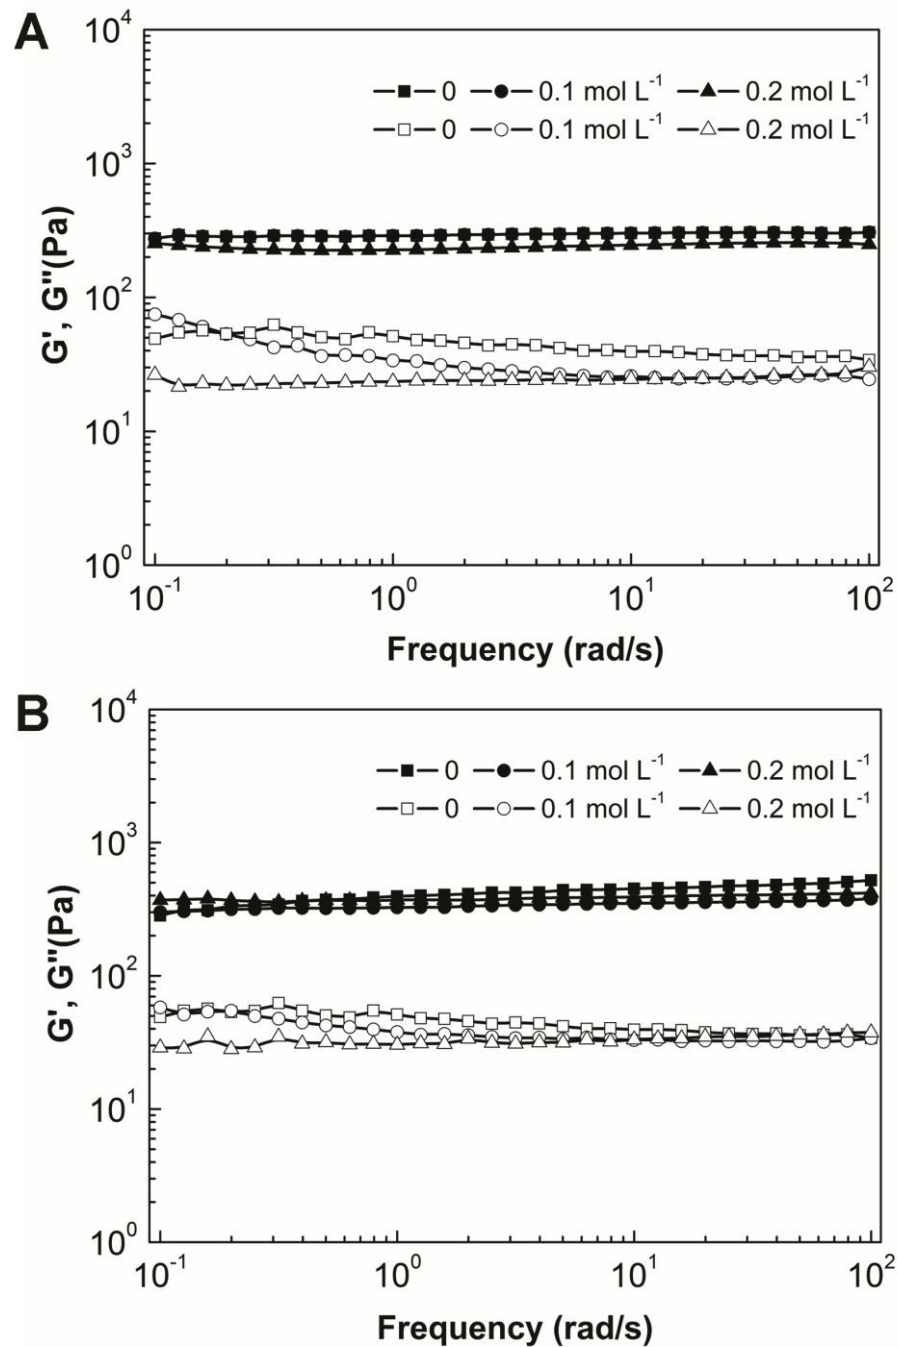

**Fig. S9** Effect of (A) acid and (B) alkali treatment on  $G'$  and  $G''$  (black and white symbols were denoted as  $G'$  and  $G''$ , respectively).

**Table S2** The relative weight swelling ratios of LDH-Ise hydrogels in water

| $\text{g L}^{-1}$ | 20   | 30   | 40   | 50   |
|-------------------|------|------|------|------|
| $m_1$ (g)         | 2.04 | 2.06 | 2.08 | 2.10 |
| $m_2$ (g)         | 2.05 | 2.07 | 2.09 | 2.12 |
| $(m_2 - m_1)/m_1$ | 0.5% | 0.5% | 0.5% | 1.0% |
